# Supplementary material
Source: publisher figshare collection journal article supplement (https://springernature.figshare.com/ndownloader/files/16884704)
Supplement: Supplementary file 1 [file 16884704]

## Sheet: Readme
% Re-gridded GLODAP data corresponding to Figure 2 of Waelbroeck et al., Scientific Data, 2019
%
% Tab1.txt contains the gridded surface (0-250 mbsl) mean reservoir age values.
% Tab2.txt contains the corresponding std values.
% Tab3.txt contains the corresponding latitude values (centre of pixel).
% Tab4.txt contains the corresponding longitude values (centre of pixel).

## Sheet: Tab1.txt
% 4 by 4 gridded Atlantic Ocean 'natural' pre-bomb surface (0-250 mbsl) mean reservoir age (in 14C yr) extracted from GLODAP.
%
% PLEASE NOTE: The gridding process may have filled in some land areas as well as some areas
% outside of the Atlantic (Mediterranean, Eastern Pacific). Please note that any values for "
% areas outside of the Atlantic are artefacts of the gridding process and should not be used.
%
NaN	NaN	NaN	NaN	NaN	NaN	NaN	NaN	NaN	NaN	NaN	NaN	NaN	NaN	NaN	NaN	NaN	NaN	NaN	NaN	NaN	NaN	NaN	NaN	NaN	NaN	NaN	NaN	NaN	NaN	NaN	NaN	NaN	NaN	NaN	NaN
NaN	NaN	NaN	NaN	NaN	NaN	NaN	NaN	NaN	NaN	NaN	NaN	NaN	NaN	NaN	NaN	NaN	NaN	NaN	NaN	NaN	NaN	NaN	NaN	NaN	NaN	NaN	NaN	NaN	NaN	NaN	NaN	NaN	NaN	NaN	NaN
NaN	NaN	NaN	NaN	NaN	NaN	NaN	NaN	NaN	NaN	NaN	NaN	NaN	NaN	NaN	NaN	NaN	NaN	NaN	NaN	NaN	NaN	NaN	NaN	NaN	NaN	NaN	NaN	NaN	NaN	NaN	NaN	NaN	NaN	NaN	NaN
NaN	NaN	NaN	NaN	NaN	NaN	NaN	NaN	NaN	NaN	NaN	NaN	NaN	NaN	NaN	NaN	NaN	NaN	NaN	NaN	NaN	1050	1050	1050	1040	1110	1090	1100	1100	1110	1130	1170	1180	NaN	NaN	NaN
NaN	NaN	NaN	NaN	NaN	NaN	NaN	NaN	NaN	NaN	NaN	NaN	1090	1070	1060	1090	1090	1060	1070	1080	1060	1100	1090	1060	1060	1060	1090	1100	1080	1080	1080	1090	1180	1100	NaN	NaN
NaN	NaN	NaN	NaN	NaN	NaN	NaN	NaN	918	990	985	1040	993	1150	1040	1040	1040	991	1020	1020	1040	1030	1130	1090	966	960	956	985	962	964	965	1000	1050	1110	NaN	NaN
NaN	NaN	NaN	NaN	NaN	NaN	NaN	NaN	817	722	852	858	861	919	907	987	881	849	851	951	864	965	1020	1030	926	852	1090	1020	893	884	867	876	1040	890	908	NaN
NaN	NaN	NaN	NaN	NaN	NaN	NaN	NaN	791	721	823	909	751	752	792	897	880	742	837	860	822	827	849	838	749	754	938	791	879	852	830	774	999	758	774	NaN
NaN	NaN	NaN	NaN	NaN	NaN	NaN	NaN	764	720	742	649	647	603	620	685	613	736	788	758	779	689	676	650	630	613	785	781	836	822	753	691	735	703	682	NaN
NaN	NaN	NaN	NaN	NaN	NaN	NaN	NaN	738	694	647	583	609	605	571	657	607	548	583	625	629	665	614	577	598	583	625	657	707	711	651	610	610	503	728	NaN
NaN	NaN	NaN	NaN	NaN	NaN	NaN	NaN	711	668	613	546	562	537	575	587	609	555	562	562	598	491	523	578	605	609	560	586	499	599	572	568	429	511	NaN	NaN
NaN	NaN	NaN	NaN	NaN	NaN	NaN	NaN	685	643	579	475	446	492	506	561	595	440	485	517	466	435	515	522	531	488	585	551	487	562	584	527	446	545	NaN	NaN
NaN	NaN	NaN	NaN	NaN	NaN	NaN	714	659	617	545	476	527	390	490	486	578	319	459	531	406	461	488	411	461	509	469	447	557	595	574	456	423	600	NaN	NaN
NaN	NaN	NaN	NaN	NaN	NaN	NaN	662	632	591	512	477	528	533	538	520	494	505	414	493	481	373	393	440	458	516	540	465	498	554	482	410	425	655	NaN	NaN
NaN	NaN	NaN	NaN	NaN	NaN	NaN	635	606	565	478	478	514	533	518	557	471	495	506	454	386	486	534	507	515	444	521	496	568	518	446	466	418	709	NaN	NaN
NaN	NaN	NaN	NaN	NaN	NaN	NaN	609	580	539	444	479	497	536	493	502	490	483	504	520	435	542	538	534	525	528	505	558	597	483	463	459	472	NaN	NaN	NaN
NaN	NaN	NaN	NaN	NaN	NaN	NaN	583	553	513	430	478	495	531	483	459	478	437	496	505	538	569	562	515	550	558	540	592	554	447	500	452	527	NaN	NaN	NaN
NaN	NaN	NaN	NaN	NaN	NaN	NaN	556	527	487	431	462	506	527	472	449	523	538	478	479	506	573	589	566	580	575	567	590	455	541	493	445	581	NaN	NaN	NaN
NaN	NaN	NaN	NaN	NaN	NaN	NaN	530	501	462	432	458	517	523	462	439	564	522	581	564	602	590	592	581	573	529	599	578	592	534	487	439	636	NaN	NaN	NaN
NaN	NaN	NaN	NaN	NaN	NaN	NaN	504	474	428	427	469	528	519	452	498	545	576	513	601	599	593	591	613	554	604	589	590	575	528	480	432	NaN	NaN	NaN	NaN
NaN	NaN	NaN	NaN	NaN	NaN	506	477	448	394	420	479	539	515	449	549	564	599	474	536	576	601	589	604	564	609	613	587	569	521	473	453	NaN	NaN	NaN	NaN
NaN	NaN	NaN	NaN	NaN	NaN	480	451	422	385	431	490	549	456	498	577	611	584	537	538	577	612	609	558	541	603	589	577	562	514	466	508	NaN	NaN	NaN	NaN
NaN	NaN	NaN	NaN	NaN	NaN	454	425	395	383	442	472	571	589	588	560	605	593	460	569	578	602	579	547	551	591	577	569	555	507	460	563	NaN	NaN	NaN	NaN
NaN	NaN	NaN	NaN	NaN	NaN	427	398	369	458	467	513	557	519	488	584	585	596	466	591	563	549	522	507	552	579	566	561	548	501	453	617	NaN	NaN	NaN	NaN
NaN	NaN	NaN	NaN	NaN	NaN	401	372	401	362	367	426	540	407	430	299	345	405	552	538	512	497	466	472	565	566	558	553	542	494	446	NaN	NaN	NaN	NaN	NaN
NaN	NaN	NaN	NaN	NaN	NaN	375	342	492	494	281	430	518	428	432	511	504	523	521	391	497	441	468	475	568	556	550	545	535	487	439	NaN	NaN	NaN	NaN	NaN
NaN	NaN	NaN	NaN	NaN	NaN	345	430	485	347	488	454	508	477	433	397	311	396	409	412	393	384	528	488	556	548	542	539	528	480	489	NaN	NaN	NaN	NaN	NaN
NaN	NaN	NaN	NaN	NaN	NaN	458	408	461	312	328	384	469	383	344	487	384	357	462	479	349	393	398	501	545	540	534	533	521	474	544	NaN	NaN	NaN	NaN	NaN
NaN	NaN	NaN	NaN	NaN	NaN	467	462	418	486	413	281	271	419	405	414	390	400	380	419	301	376	435	514	537	532	526	527	515	467	NaN	NaN	NaN	NaN	NaN	NaN
NaN	NaN	NaN	NaN	NaN	NaN	NaN	492	434	473	514	456	409	495	506	525	478	500	482	450	336	508	515	534	529	524	518	522	508	460	NaN	NaN	NaN	NaN	NaN	NaN
NaN	NaN	NaN	NaN	NaN	NaN	NaN	555	557	527	512	505	355	542	457	495	502	448	548	505	540	483	468	501	521	516	510	516	501	453	NaN	NaN	NaN	NaN	NaN	NaN
NaN	NaN	NaN	NaN	NaN	NaN	NaN	NaN	586	527	706	582	603	591	386	485	522	402	405	513	383	458	480	546	513	508	502	510	494	470	NaN	NaN	NaN	NaN	NaN	NaN
NaN	NaN	NaN	NaN	NaN	NaN	NaN	NaN	NaN	554	457	513	653	633	497	455	444	419	444	439	444	422	401	517	505	500	494	505	488	525	NaN	NaN	NaN	NaN	NaN	NaN
NaN	NaN	NaN	NaN	NaN	NaN	NaN	NaN	NaN	NaN	451	439	586	565	438	586	445	438	451	431	423	412	436	478	489	492	486	499	481	NaN	NaN	NaN	NaN	NaN	NaN	NaN
NaN	NaN	NaN	NaN	NaN	NaN	NaN	NaN	NaN	NaN	NaN	519	625	490	502	455	468	439	430	426	441	426	393	438	496	484	478	493	474	NaN	NaN	NaN	NaN	NaN	NaN	NaN
NaN	NaN	NaN	NaN	NaN	NaN	NaN	NaN	NaN	NaN	NaN	NaN	NaN	605	458	420	421	423	431	443	426	421	422	425	457	476	472	487	467	NaN	NaN	NaN	NaN	NaN	NaN	NaN
NaN	NaN	NaN	NaN	NaN	NaN	NaN	NaN	NaN	NaN	NaN	NaN	NaN	NaN	NaN	419	433	419	430	420	419	419	423	425	430	475	467	482	461	NaN	NaN	NaN	NaN	NaN	NaN	NaN
NaN	NaN	NaN	NaN	NaN	NaN	NaN	NaN	NaN	NaN	NaN	NaN	NaN	NaN	NaN	NaN	NaN	NaN	426	460	418	423	430	446	438	443	461	476	NaN	NaN	NaN	NaN	NaN	NaN	NaN	NaN
NaN	NaN	NaN	NaN	NaN	NaN	NaN	NaN	NaN	NaN	NaN	NaN	NaN	NaN	NaN	NaN	NaN	NaN	NaN	NaN	NaN	440	430	426	455	432	456	470	NaN	NaN	NaN	NaN	NaN	NaN	NaN	NaN
NaN	NaN	NaN	NaN	NaN	NaN	NaN	NaN	NaN	NaN	NaN	NaN	NaN	NaN	NaN	NaN	NaN	NaN	NaN	NaN	NaN	NaN	NaN	NaN	NaN	480	441	465	NaN	NaN	NaN	NaN	NaN	NaN	NaN	NaN
NaN	NaN	NaN	NaN	NaN	NaN	NaN	NaN	NaN	NaN	NaN	NaN	NaN	NaN	NaN	NaN	NaN	NaN	NaN	NaN	NaN	NaN	NaN	NaN	NaN	NaN	NaN	NaN	NaN	NaN	NaN	NaN	NaN	NaN	NaN	NaN

## Sheet: Tab2.txt
% Std values of the 4 by 4 gridded Atlantic Ocean 'natural' pre-bomb surface (0-250 mbsl) reservoir age (in 14C yr) extracted from GLODAP.
%
% PLEASE NOTE: The gridding process may have filled in some land areas as well as some areas
% outside of the Atlantic (Mediterranean, Eastern Pacific). Please note that any values for "
% areas outside of the Atlantic are artefacts of the gridding process and should not be used.
%
NaN	NaN	NaN	NaN	NaN	NaN	NaN	NaN	NaN	NaN	NaN	NaN	NaN	NaN	NaN	NaN	NaN	NaN	NaN	NaN	NaN	NaN	NaN	NaN	NaN	NaN	NaN	NaN	NaN	NaN	NaN	NaN	NaN	NaN	NaN	NaN
NaN	NaN	NaN	NaN	NaN	NaN	NaN	NaN	NaN	NaN	NaN	NaN	NaN	NaN	NaN	NaN	NaN	NaN	NaN	NaN	NaN	NaN	NaN	NaN	NaN	NaN	NaN	NaN	NaN	NaN	NaN	NaN	NaN	NaN	NaN	NaN
NaN	NaN	NaN	NaN	NaN	NaN	NaN	NaN	NaN	NaN	NaN	NaN	NaN	NaN	NaN	NaN	NaN	NaN	NaN	NaN	NaN	NaN	NaN	NaN	NaN	NaN	NaN	NaN	NaN	NaN	NaN	NaN	NaN	NaN	NaN	NaN
NaN	NaN	NaN	NaN	NaN	NaN	NaN	NaN	NaN	NaN	NaN	NaN	NaN	NaN	NaN	NaN	NaN	NaN	NaN	NaN	NaN	8.14	8.2	8.16	9.46	69.8	65.9	62.8	48.1	49.2	61	73.1	71.6	NaN	NaN	NaN
NaN	NaN	NaN	NaN	NaN	NaN	NaN	NaN	NaN	NaN	NaN	NaN	28.9	2.68	0	13.6	0	0	11.2	33.3	1.43	45.8	30.2	2.52e-15	0	0	47.5	63.4	43.3	46.2	49.2	52.7	62.6	47.5	NaN	NaN
NaN	NaN	NaN	NaN	NaN	NaN	NaN	NaN	0	20.3	17.3	65.6	64.8	133	66.4	52.7	67.4	22.2	44.7	58.2	94.4	44.3	75.1	71.9	1.63	5.02	0	35.3	15.1	17.9	20.7	26.8	37.8	39.7	NaN	NaN
NaN	NaN	NaN	NaN	NaN	NaN	NaN	NaN	72	1.96e-14	7.44e-14	9.38	12.9	37.7	42.7	104	21.9	0	0	104	8.68	13.6	0	0	0	0	85.9	22	50.2	40	11.4	4.49	33.2	5.45	13.5	NaN
NaN	NaN	NaN	NaN	NaN	NaN	NaN	NaN	70.7	71.2	40.4	23.5	0	2.91e-14	49	132	118	0	22.3	106	46.7	16.3	0	0	0	0	93.2	44	159	73	55.9	9.87	7	22.4	13.8	NaN
NaN	NaN	NaN	NaN	NaN	NaN	NaN	NaN	69.5	65.1	88.9	44.3	67.5	13.6	5.53	90.3	0.0206	134	61.3	88.8	84	18.9	0	0	0	0	45.6	156	178	125	70	24.1	22.4	41.3	0	NaN
NaN	NaN	NaN	NaN	NaN	NaN	NaN	NaN	68.2	64.5	58.5	60.1	15.2	49.2	25.9	72.1	53.9	12.6	12.4	56.9	56.6	109	43.8	19.1	28.2	24.9	52.9	93	108	111	68.5	39.9	46.3	40.3	2.47	NaN
NaN	NaN	NaN	NaN	NaN	NaN	NaN	NaN	67	63.8	56.9	81	56.3	50.4	59.8	57.1	62.8	45.1	44.4	56.1	84.6	25.1	66.2	56	59.6	42.7	63.1	59.4	43.8	83.1	65.7	59.7	82.6	0	NaN	NaN
NaN	NaN	NaN	NaN	NaN	NaN	NaN	NaN	65.7	63.2	55.3	46.8	109	85.9	84.2	81	84.5	80.5	71.2	66.1	44.4	51.5	71.6	68.9	69.2	39.2	94.3	106	51.8	97.4	117	98.3	37.9	2.17	NaN	NaN
NaN	NaN	NaN	NaN	NaN	NaN	NaN	25.5	64.5	62.6	53.6	59.2	113	92.2	87.3	74	102	29.1	85.1	64.5	41.8	75.2	81.2	57.3	92.5	104	90.8	81.9	80.1	125	110	80.5	2.27	4.86	NaN	NaN
NaN	NaN	NaN	NaN	NaN	NaN	NaN	47.9	63.2	62	52	71.5	125	112	103	74.6	82.2	113	77.1	113	84.5	36.1	36.2	83.3	91.5	116	99.1	90.8	128	130	89	47.6	5.15	7.56	NaN	NaN
NaN	NaN	NaN	NaN	NaN	NaN	NaN	46.6	62	61.4	50.4	83.9	115	99.2	99.8	90.3	106	112	112	114	61.7	95.3	110	97.6	118	111	123	123	132	93	51.6	16.9	4.6	10.2	NaN	NaN
NaN	NaN	NaN	NaN	NaN	NaN	NaN	45.4	60.7	60.7	48.7	96.3	102	91.3	93.7	91.3	111	112	119	106	79.7	121	121	114	132	114	125	149	131	55.6	11.2	16.3	7.26	NaN	NaN	NaN
NaN	NaN	NaN	NaN	NaN	NaN	NaN	44.1	59.5	60.1	55.3	106	89.5	86.7	98.2	70.7	74.4	77.8	81	94.5	70.1	80.9	100	97.9	125	125	151	147	88.3	18.2	28.1	15.8	9.95	NaN	NaN	NaN
NaN	NaN	NaN	NaN	NaN	NaN	NaN	42.9	58.2	59.5	67.7	92.5	77.5	82	103	75.3	76.4	83.1	62.8	93.7	55.1	98.3	112	105	114	106	128	129	7.5	39.8	27.5	15.2	12.6	NaN	NaN	NaN
NaN	NaN	NaN	NaN	NaN	NaN	NaN	41.6	57	58.9	80.1	79.9	65.5	77.4	107	79.8	64.4	49	62.3	71.9	79.1	72.8	89.1	84	110	72.3	99.6	96.8	72.6	39.2	26.9	14.7	15.3	NaN	NaN	NaN
NaN	NaN	NaN	NaN	NaN	NaN	NaN	40.4	55.7	57.3	83	67.9	53.6	72.8	112	72.1	71.5	32.3	77	56.9	58	50	53.4	60.7	61	50.3	60.5	52.3	51	38.7	26.4	14.1	NaN	NaN	NaN	NaN
NaN	NaN	NaN	NaN	NaN	NaN	23.7	39.1	54.5	55.7	70.2	55.9	41.6	68.2	114	35.5	11.7	29.6	85.6	86.4	25.5	77.2	50.4	34.1	93.8	41.6	53.4	59.3	50.4	38.1	25.8	15	NaN	NaN	NaN	NaN
NaN	NaN	NaN	NaN	NaN	NaN	22.5	37.9	53.3	63.8	58.2	43.9	29.6	123	87.6	55.7	38.3	40.7	50.5	101	31.9	45.5	46.1	45.1	103	76.2	66.9	57.8	49.8	37.6	25.3	17.7	NaN	NaN	NaN	NaN
NaN	NaN	NaN	NaN	NaN	NaN	21.3	36.6	52	60.6	46.2	163	29	53.4	68.9	88.1	51.6	48.6	134	41.8	38.7	49.3	56.8	79.2	78.4	74.5	65.2	56.4	49.3	37	24.7	20.4	NaN	NaN	NaN	NaN
NaN	NaN	NaN	NaN	NaN	NaN	20	35.4	50.8	112	119	75.7	57.5	66.4	71.2	57.9	53.5	65.1	70.4	53.4	67.3	63.9	51.5	81	63.9	72.8	63.7	55	48.7	36.5	24.2	23.1	NaN	NaN	NaN	NaN
NaN	NaN	NaN	NaN	NaN	NaN	18.8	34.1	85.2	108	103	122	80.6	121	80.6	96.3	67.3	29	76.7	72	84.2	55.4	46.1	49.3	74.2	71.1	62.3	53.6	48.2	35.9	23.6	NaN	NaN	NaN	NaN	NaN
NaN	NaN	NaN	NaN	NaN	NaN	17.5	83.5	75.5	87.5	72.1	90.2	97.7	154	111	72.3	104	92.3	81.7	68.9	105	35.6	66.2	39.7	78.7	69.5	60.9	52.2	47.6	35.3	23.1	NaN	NaN	NaN	NaN	NaN
NaN	NaN	NaN	NaN	NaN	NaN	61.3	105	96.6	73.1	142	142	114	134	142	167	42.2	111	101	145	15.2	15.8	112	50.1	77.1	68.1	59.5	51.6	47.1	34.8	25.5	NaN	NaN	NaN	NaN	NaN
NaN	NaN	NaN	NaN	NaN	NaN	84.1	162	131	111	93.5	121	149	125	121	101	96.9	127	98.9	84.9	34.9	84.3	15.6	60.5	75.4	66.7	58.1	51.3	46.5	34.2	28.2	NaN	NaN	NaN	NaN	NaN
NaN	NaN	NaN	NaN	NaN	NaN	37.1	104	94.2	76.8	92.8	50	42.1	97.6	84.8	80.9	114	99.5	17.5	70	41.8	31.5	33.1	70.9	74	65.3	56.6	50.9	46	33.7	NaN	NaN	NaN	NaN	NaN	NaN
NaN	NaN	NaN	NaN	NaN	NaN	NaN	80.8	90.4	31.7	72	82.6	75.9	86.9	69.9	57	71.5	70.6	64.6	47.3	29.1	67.4	67.6	81.3	72.6	63.9	55.2	50.6	45.4	33.1	NaN	NaN	NaN	NaN	NaN	NaN
NaN	NaN	NaN	NaN	NaN	NaN	NaN	83	94.8	79.9	74.4	99.2	37.1	72.4	66.8	90.2	76.9	75.8	68.9	68.7	71.3	75.8	77.9	67.7	71.2	62.5	53.8	50.2	44.9	32.6	NaN	NaN	NaN	NaN	NaN	NaN
NaN	NaN	NaN	NaN	NaN	NaN	NaN	NaN	42.8	72.3	162	94.5	98.8	139	84.8	75.5	67.8	54	38.9	58.2	12.8	46.8	71.4	53.3	69.8	61.1	52.4	49.9	44.3	33.3	NaN	NaN	NaN	NaN	NaN	NaN
NaN	NaN	NaN	NaN	NaN	NaN	NaN	NaN	NaN	24.6	15.6	34.2	54.1	188	66.5	3.74	0	31.8	0	9.86	0	9.35	48.8	37.8	68.4	59.7	51	49.6	43.7	36	NaN	NaN	NaN	NaN	NaN	NaN
NaN	NaN	NaN	NaN	NaN	NaN	NaN	NaN	NaN	NaN	19.2	4.12	26.5	54.8	0.0744	60.8	7.53	3.61	19.8	9.94	16.2	10.2	0	22	57.7	58.3	49.6	49.2	43.2	NaN	NaN	NaN	NaN	NaN	NaN	NaN
NaN	NaN	NaN	NaN	NaN	NaN	NaN	NaN	NaN	NaN	NaN	106	95.4	78.1	24.1	23.3	0	43	4.75	7.1	38.1	6.3	51	6.31	42.7	56.9	48.2	48.9	42.6	NaN	NaN	NaN	NaN	NaN	NaN	NaN
NaN	NaN	NaN	NaN	NaN	NaN	NaN	NaN	NaN	NaN	NaN	NaN	NaN	176	36.1	0	0	2.31	22.4	75.8	13.1	1.81	21.8	36.5	27	55.5	47.8	48.6	42.1	NaN	NaN	NaN	NaN	NaN	NaN	NaN
NaN	NaN	NaN	NaN	NaN	NaN	NaN	NaN	NaN	NaN	NaN	NaN	NaN	NaN	NaN	0	7.34	1.98e-14	18.8	2.58	1.44e-14	0.431	9.18	11.4	13	47.6	47.4	48.2	41.5	NaN	NaN	NaN	NaN	NaN	NaN	NaN
NaN	NaN	NaN	NaN	NaN	NaN	NaN	NaN	NaN	NaN	NaN	NaN	NaN	NaN	NaN	NaN	NaN	NaN	6.2	21.4	1e-13	11.6	26	44	45.7	32.9	47.1	47.9	NaN	NaN	NaN	NaN	NaN	NaN	NaN	NaN
NaN	NaN	NaN	NaN	NaN	NaN	NaN	NaN	NaN	NaN	NaN	NaN	NaN	NaN	NaN	NaN	NaN	NaN	NaN	NaN	NaN	19.1	10.8	11.4	40.1	19.2	47.2	47.5	NaN	NaN	NaN	NaN	NaN	NaN	NaN	NaN
NaN	NaN	NaN	NaN	NaN	NaN	NaN	NaN	NaN	NaN	NaN	NaN	NaN	NaN	NaN	NaN	NaN	NaN	NaN	NaN	NaN	NaN	NaN	NaN	NaN	37.9	23.9	47.2	NaN	NaN	NaN	NaN	NaN	NaN	NaN	NaN
NaN	NaN	NaN	NaN	NaN	NaN	NaN	NaN	NaN	NaN	NaN	NaN	NaN	NaN	NaN	NaN	NaN	NaN	NaN	NaN	NaN	NaN	NaN	NaN	NaN	NaN	NaN	NaN	NaN	NaN	NaN	NaN	NaN	NaN	NaN	NaN

## Sheet: Tab3.txt
% Latitudes (centre of pixel) of the 4 by 4 gridded Atlantic Ocean 'natural' pre-bomb surface (0-250 mbsl) reservoir age (in 14C yr) extracted from GLODAP.
%
% PLEASE NOTE: The gridding process may have filled in some land areas as well as some areas
% outside of the Atlantic (Mediterranean, Eastern Pacific). Please note that any values for "
% areas outside of the Atlantic are artefacts of the gridding process and should not be used.
%
-80	-80	-80	-80	-80	-80	-80	-80	-80	-80	-80	-80	-80	-80	-80	-80	-80	-80	-80	-80	-80	-80	-80	-80	-80	-80	-80	-80	-80	-80	-80	-80	-80	-80	-80	-80
-76	-76	-76	-76	-76	-76	-76	-76	-76	-76	-76	-76	-76	-76	-76	-76	-76	-76	-76	-76	-76	-76	-76	-76	-76	-76	-76	-76	-76	-76	-76	-76	-76	-76	-76	-76
-72	-72	-72	-72	-72	-72	-72	-72	-72	-72	-72	-72	-72	-72	-72	-72	-72	-72	-72	-72	-72	-72	-72	-72	-72	-72	-72	-72	-72	-72	-72	-72	-72	-72	-72	-72
-68	-68	-68	-68	-68	-68	-68	-68	-68	-68	-68	-68	-68	-68	-68	-68	-68	-68	-68	-68	-68	-68	-68	-68	-68	-68	-68	-68	-68	-68	-68	-68	-68	-68	-68	-68
-64	-64	-64	-64	-64	-64	-64	-64	-64	-64	-64	-64	-64	-64	-64	-64	-64	-64	-64	-64	-64	-64	-64	-64	-64	-64	-64	-64	-64	-64	-64	-64	-64	-64	-64	-64
-60	-60	-60	-60	-60	-60	-60	-60	-60	-60	-60	-60	-60	-60	-60	-60	-60	-60	-60	-60	-60	-60	-60	-60	-60	-60	-60	-60	-60	-60	-60	-60	-60	-60	-60	-60
-56	-56	-56	-56	-56	-56	-56	-56	-56	-56	-56	-56	-56	-56	-56	-56	-56	-56	-56	-56	-56	-56	-56	-56	-56	-56	-56	-56	-56	-56	-56	-56	-56	-56	-56	-56
-52	-52	-52	-52	-52	-52	-52	-52	-52	-52	-52	-52	-52	-52	-52	-52	-52	-52	-52	-52	-52	-52	-52	-52	-52	-52	-52	-52	-52	-52	-52	-52	-52	-52	-52	-52
-48	-48	-48	-48	-48	-48	-48	-48	-48	-48	-48	-48	-48	-48	-48	-48	-48	-48	-48	-48	-48	-48	-48	-48	-48	-48	-48	-48	-48	-48	-48	-48	-48	-48	-48	-48
-44	-44	-44	-44	-44	-44	-44	-44	-44	-44	-44	-44	-44	-44	-44	-44	-44	-44	-44	-44	-44	-44	-44	-44	-44	-44	-44	-44	-44	-44	-44	-44	-44	-44	-44	-44
-40	-40	-40	-40	-40	-40	-40	-40	-40	-40	-40	-40	-40	-40	-40	-40	-40	-40	-40	-40	-40	-40	-40	-40	-40	-40	-40	-40	-40	-40	-40	-40	-40	-40	-40	-40
-36	-36	-36	-36	-36	-36	-36	-36	-36	-36	-36	-36	-36	-36	-36	-36	-36	-36	-36	-36	-36	-36	-36	-36	-36	-36	-36	-36	-36	-36	-36	-36	-36	-36	-36	-36
-32	-32	-32	-32	-32	-32	-32	-32	-32	-32	-32	-32	-32	-32	-32	-32	-32	-32	-32	-32	-32	-32	-32	-32	-32	-32	-32	-32	-32	-32	-32	-32	-32	-32	-32	-32
-28	-28	-28	-28	-28	-28	-28	-28	-28	-28	-28	-28	-28	-28	-28	-28	-28	-28	-28	-28	-28	-28	-28	-28	-28	-28	-28	-28	-28	-28	-28	-28	-28	-28	-28	-28
-24	-24	-24	-24	-24	-24	-24	-24	-24	-24	-24	-24	-24	-24	-24	-24	-24	-24	-24	-24	-24	-24	-24	-24	-24	-24	-24	-24	-24	-24	-24	-24	-24	-24	-24	-24
-20	-20	-20	-20	-20	-20	-20	-20	-20	-20	-20	-20	-20	-20	-20	-20	-20	-20	-20	-20	-20	-20	-20	-20	-20	-20	-20	-20	-20	-20	-20	-20	-20	-20	-20	-20
-16	-16	-16	-16	-16	-16	-16	-16	-16	-16	-16	-16	-16	-16	-16	-16	-16	-16	-16	-16	-16	-16	-16	-16	-16	-16	-16	-16	-16	-16	-16	-16	-16	-16	-16	-16
-12	-12	-12	-12	-12	-12	-12	-12	-12	-12	-12	-12	-12	-12	-12	-12	-12	-12	-12	-12	-12	-12	-12	-12	-12	-12	-12	-12	-12	-12	-12	-12	-12	-12	-12	-12
-8	-8	-8	-8	-8	-8	-8	-8	-8	-8	-8	-8	-8	-8	-8	-8	-8	-8	-8	-8	-8	-8	-8	-8	-8	-8	-8	-8	-8	-8	-8	-8	-8	-8	-8	-8
-4	-4	-4	-4	-4	-4	-4	-4	-4	-4	-4	-4	-4	-4	-4	-4	-4	-4	-4	-4	-4	-4	-4	-4	-4	-4	-4	-4	-4	-4	-4	-4	-4	-4	-4	-4
0	0	0	0	0	0	0	0	0	0	0	0	0	0	0	0	0	0	0	0	0	0	0	0	0	0	0	0	0	0	0	0	0	0	0	0
4	4	4	4	4	4	4	4	4	4	4	4	4	4	4	4	4	4	4	4	4	4	4	4	4	4	4	4	4	4	4	4	4	4	4	4
8	8	8	8	8	8	8	8	8	8	8	8	8	8	8	8	8	8	8	8	8	8	8	8	8	8	8	8	8	8	8	8	8	8	8	8
12	12	12	12	12	12	12	12	12	12	12	12	12	12	12	12	12	12	12	12	12	12	12	12	12	12	12	12	12	12	12	12	12	12	12	12
16	16	16	16	16	16	16	16	16	16	16	16	16	16	16	16	16	16	16	16	16	16	16	16	16	16	16	16	16	16	16	16	16	16	16	16
20	20	20	20	20	20	20	20	20	20	20	20	20	20	20	20	20	20	20	20	20	20	20	20	20	20	20	20	20	20	20	20	20	20	20	20
24	24	24	24	24	24	24	24	24	24	24	24	24	24	24	24	24	24	24	24	24	24	24	24	24	24	24	24	24	24	24	24	24	24	24	24
28	28	28	28	28	28	28	28	28	28	28	28	28	28	28	28	28	28	28	28	28	28	28	28	28	28	28	28	28	28	28	28	28	28	28	28
32	32	32	32	32	32	32	32	32	32	32	32	32	32	32	32	32	32	32	32	32	32	32	32	32	32	32	32	32	32	32	32	32	32	32	32
36	36	36	36	36	36	36	36	36	36	36	36	36	36	36	36	36	36	36	36	36	36	36	36	36	36	36	36	36	36	36	36	36	36	36	36
40	40	40	40	40	40	40	40	40	40	40	40	40	40	40	40	40	40	40	40	40	40	40	40	40	40	40	40	40	40	40	40	40	40	40	40
44	44	44	44	44	44	44	44	44	44	44	44	44	44	44	44	44	44	44	44	44	44	44	44	44	44	44	44	44	44	44	44	44	44	44	44
48	48	48	48	48	48	48	48	48	48	48	48	48	48	48	48	48	48	48	48	48	48	48	48	48	48	48	48	48	48	48	48	48	48	48	48
52	52	52	52	52	52	52	52	52	52	52	52	52	52	52	52	52	52	52	52	52	52	52	52	52	52	52	52	52	52	52	52	52	52	52	52
56	56	56	56	56	56	56	56	56	56	56	56	56	56	56	56	56	56	56	56	56	56	56	56	56	56	56	56	56	56	56	56	56	56	56	56
60	60	60	60	60	60	60	60	60	60	60	60	60	60	60	60	60	60	60	60	60	60	60	60	60	60	60	60	60	60	60	60	60	60	60	60
64	64	64	64	64	64	64	64	64	64	64	64	64	64	64	64	64	64	64	64	64	64	64	64	64	64	64	64	64	64	64	64	64	64	64	64
68	68	68	68	68	68	68	68	68	68	68	68	68	68	68	68	68	68	68	68	68	68	68	68	68	68	68	68	68	68	68	68	68	68	68	68
72	72	72	72	72	72	72	72	72	72	72	72	72	72	72	72	72	72	72	72	72	72	72	72	72	72	72	72	72	72	72	72	72	72	72	72
76	76	76	76	76	76	76	76	76	76	76	76	76	76	76	76	76	76	76	76	76	76	76	76	76	76	76	76	76	76	76	76	76	76	76	76
80	80	80	80	80	80	80	80	80	80	80	80	80	80	80	80	80	80	80	80	80	80	80	80	80	80	80	80	80	80	80	80	80	80	80	80

## Sheet: Tab4.txt
% Longitudes (centre of pixel) of the 4 by 4 gridded Atlantic Ocean 'natural' pre-bomb surface (0-250 mbsl) reservoir age (in 14C yr) extracted from GLODAP.
%
% PLEASE NOTE: The gridding process may have filled in some land areas as well as some areas
% outside of the Atlantic (Mediterranean, Eastern Pacific). Please note that any values for "
% areas outside of the Atlantic are artefacts of the gridding process and should not be used.
%
-100	-96	-92	-88	-84	-80	-76	-72	-68	-64	-60	-56	-52	-48	-44	-40	-36	-32	-28	-24	-20	-16	-12	-8	-4	0	4	8	12	16	20	24	28	32	36	40
-100	-96	-92	-88	-84	-80	-76	-72	-68	-64	-60	-56	-52	-48	-44	-40	-36	-32	-28	-24	-20	-16	-12	-8	-4	0	4	8	12	16	20	24	28	32	36	40
-100	-96	-92	-88	-84	-80	-76	-72	-68	-64	-60	-56	-52	-48	-44	-40	-36	-32	-28	-24	-20	-16	-12	-8	-4	0	4	8	12	16	20	24	28	32	36	40
-100	-96	-92	-88	-84	-80	-76	-72	-68	-64	-60	-56	-52	-48	-44	-40	-36	-32	-28	-24	-20	-16	-12	-8	-4	0	4	8	12	16	20	24	28	32	36	40
-100	-96	-92	-88	-84	-80	-76	-72	-68	-64	-60	-56	-52	-48	-44	-40	-36	-32	-28	-24	-20	-16	-12	-8	-4	0	4	8	12	16	20	24	28	32	36	40
-100	-96	-92	-88	-84	-80	-76	-72	-68	-64	-60	-56	-52	-48	-44	-40	-36	-32	-28	-24	-20	-16	-12	-8	-4	0	4	8	12	16	20	24	28	32	36	40
-100	-96	-92	-88	-84	-80	-76	-72	-68	-64	-60	-56	-52	-48	-44	-40	-36	-32	-28	-24	-20	-16	-12	-8	-4	0	4	8	12	16	20	24	28	32	36	40
-100	-96	-92	-88	-84	-80	-76	-72	-68	-64	-60	-56	-52	-48	-44	-40	-36	-32	-28	-24	-20	-16	-12	-8	-4	0	4	8	12	16	20	24	28	32	36	40
-100	-96	-92	-88	-84	-80	-76	-72	-68	-64	-60	-56	-52	-48	-44	-40	-36	-32	-28	-24	-20	-16	-12	-8	-4	0	4	8	12	16	20	24	28	32	36	40
-100	-96	-92	-88	-84	-80	-76	-72	-68	-64	-60	-56	-52	-48	-44	-40	-36	-32	-28	-24	-20	-16	-12	-8	-4	0	4	8	12	16	20	24	28	32	36	40
-100	-96	-92	-88	-84	-80	-76	-72	-68	-64	-60	-56	-52	-48	-44	-40	-36	-32	-28	-24	-20	-16	-12	-8	-4	0	4	8	12	16	20	24	28	32	36	40
-100	-96	-92	-88	-84	-80	-76	-72	-68	-64	-60	-56	-52	-48	-44	-40	-36	-32	-28	-24	-20	-16	-12	-8	-4	0	4	8	12	16	20	24	28	32	36	40
-100	-96	-92	-88	-84	-80	-76	-72	-68	-64	-60	-56	-52	-48	-44	-40	-36	-32	-28	-24	-20	-16	-12	-8	-4	0	4	8	12	16	20	24	28	32	36	40
-100	-96	-92	-88	-84	-80	-76	-72	-68	-64	-60	-56	-52	-48	-44	-40	-36	-32	-28	-24	-20	-16	-12	-8	-4	0	4	8	12	16	20	24	28	32	36	40
-100	-96	-92	-88	-84	-80	-76	-72	-68	-64	-60	-56	-52	-48	-44	-40	-36	-32	-28	-24	-20	-16	-12	-8	-4	0	4	8	12	16	20	24	28	32	36	40
-100	-96	-92	-88	-84	-80	-76	-72	-68	-64	-60	-56	-52	-48	-44	-40	-36	-32	-28	-24	-20	-16	-12	-8	-4	0	4	8	12	16	20	24	28	32	36	40
-100	-96	-92	-88	-84	-80	-76	-72	-68	-64	-60	-56	-52	-48	-44	-40	-36	-32	-28	-24	-20	-16	-12	-8	-4	0	4	8	12	16	20	24	28	32	36	40
-100	-96	-92	-88	-84	-80	-76	-72	-68	-64	-60	-56	-52	-48	-44	-40	-36	-32	-28	-24	-20	-16	-12	-8	-4	0	4	8	12	16	20	24	28	32	36	40
-100	-96	-92	-88	-84	-80	-76	-72	-68	-64	-60	-56	-52	-48	-44	-40	-36	-32	-28	-24	-20	-16	-12	-8	-4	0	4	8	12	16	20	24	28	32	36	40
-100	-96	-92	-88	-84	-80	-76	-72	-68	-64	-60	-56	-52	-48	-44	-40	-36	-32	-28	-24	-20	-16	-12	-8	-4	0	4	8	12	16	20	24	28	32	36	40
-100	-96	-92	-88	-84	-80	-76	-72	-68	-64	-60	-56	-52	-48	-44	-40	-36	-32	-28	-24	-20	-16	-12	-8	-4	0	4	8	12	16	20	24	28	32	36	40
-100	-96	-92	-88	-84	-80	-76	-72	-68	-64	-60	-56	-52	-48	-44	-40	-36	-32	-28	-24	-20	-16	-12	-8	-4	0	4	8	12	16	20	24	28	32	36	40
-100	-96	-92	-88	-84	-80	-76	-72	-68	-64	-60	-56	-52	-48	-44	-40	-36	-32	-28	-24	-20	-16	-12	-8	-4	0	4	8	12	16	20	24	28	32	36	40
-100	-96	-92	-88	-84	-80	-76	-72	-68	-64	-60	-56	-52	-48	-44	-40	-36	-32	-28	-24	-20	-16	-12	-8	-4	0	4	8	12	16	20	24	28	32	36	40
-100	-96	-92	-88	-84	-80	-76	-72	-68	-64	-60	-56	-52	-48	-44	-40	-36	-32	-28	-24	-20	-16	-12	-8	-4	0	4	8	12	16	20	24	28	32	36	40
-100	-96	-92	-88	-84	-80	-76	-72	-68	-64	-60	-56	-52	-48	-44	-40	-36	-32	-28	-24	-20	-16	-12	-8	-4	0	4	8	12	16	20	24	28	32	36	40
-100	-96	-92	-88	-84	-80	-76	-72	-68	-64	-60	-56	-52	-48	-44	-40	-36	-32	-28	-24	-20	-16	-12	-8	-4	0	4	8	12	16	20	24	28	32	36	40
-100	-96	-92	-88	-84	-80	-76	-72	-68	-64	-60	-56	-52	-48	-44	-40	-36	-32	-28	-24	-20	-16	-12	-8	-4	0	4	8	12	16	20	24	28	32	36	40
-100	-96	-92	-88	-84	-80	-76	-72	-68	-64	-60	-56	-52	-48	-44	-40	-36	-32	-28	-24	-20	-16	-12	-8	-4	0	4	8	12	16	20	24	28	32	36	40
-100	-96	-92	-88	-84	-80	-76	-72	-68	-64	-60	-56	-52	-48	-44	-40	-36	-32	-28	-24	-20	-16	-12	-8	-4	0	4	8	12	16	20	24	28	32	36	40
-100	-96	-92	-88	-84	-80	-76	-72	-68	-64	-60	-56	-52	-48	-44	-40	-36	-32	-28	-24	-20	-16	-12	-8	-4	0	4	8	12	16	20	24	28	32	36	40
-100	-96	-92	-88	-84	-80	-76	-72	-68	-64	-60	-56	-52	-48	-44	-40	-36	-32	-28	-24	-20	-16	-12	-8	-4	0	4	8	12	16	20	24	28	32	36	40
-100	-96	-92	-88	-84	-80	-76	-72	-68	-64	-60	-56	-52	-48	-44	-40	-36	-32	-28	-24	-20	-16	-12	-8	-4	0	4	8	12	16	20	24	28	32	36	40
-100	-96	-92	-88	-84	-80	-76	-72	-68	-64	-60	-56	-52	-48	-44	-40	-36	-32	-28	-24	-20	-16	-12	-8	-4	0	4	8	12	16	20	24	28	32	36	40
-100	-96	-92	-88	-84	-80	-76	-72	-68	-64	-60	-56	-52	-48	-44	-40	-36	-32	-28	-24	-20	-16	-12	-8	-4	0	4	8	12	16	20	24	28	32	36	40
-100	-96	-92	-88	-84	-80	-76	-72	-68	-64	-60	-56	-52	-48	-44	-40	-36	-32	-28	-24	-20	-16	-12	-8	-4	0	4	8	12	16	20	24	28	32	36	40
-100	-96	-92	-88	-84	-80	-76	-72	-68	-64	-60	-56	-52	-48	-44	-40	-36	-32	-28	-24	-20	-16	-12	-8	-4	0	4	8	12	16	20	24	28	32	36	40
-100	-96	-92	-88	-84	-80	-76	-72	-68	-64	-60	-56	-52	-48	-44	-40	-36	-32	-28	-24	-20	-16	-12	-8	-4	0	4	8	12	16	20	24	28	32	36	40
-100	-96	-92	-88	-84	-80	-76	-72	-68	-64	-60	-56	-52	-48	-44	-40	-36	-32	-28	-24	-20	-16	-12	-8	-4	0	4	8	12	16	20	24	28	32	36	40
-100	-96	-92	-88	-84	-80	-76	-72	-68	-64	-60	-56	-52	-48	-44	-40	-36	-32	-28	-24	-20	-16	-12	-8	-4	0	4	8	12	16	20	24	28	32	36	40
-100	-96	-92	-88	-84	-80	-76	-72	-68	-64	-60	-56	-52	-48	-44	-40	-36	-32	-28	-24	-20	-16	-12	-8	-4	0	4	8	12	16	20	24	28	32	36	40
